# Supplementary material
Source: PubMed Central journal article supplement (PMC1864879)

**ONLINE SUPPLEMENTAL MATERIALS TO:**

**Endothelial-specific expression of mitochondrial thioredoxin improves endothelial cell function and reduces atherosclerotic lesions**

Haifeng Zhang<sup>1,2\*</sup>, Wei Zhang<sup>1,2\*</sup>, Yan Luo<sup>1,2\*</sup>, Yun He<sup>1,2\*</sup>, Rong Zhang<sup>1,2</sup>, Yan Huang<sup>1,3</sup>, Pascal Bernatchez<sup>1,4</sup>, Frank J. Giordano<sup>1,3</sup>, Gerald Shadel<sup>2</sup>, William C. Sessa<sup>1,4</sup>, and Wang Min<sup>1,2,5</sup>

<sup>1</sup>Interdepartmental Program in Vascular Biology and Transplantation, Boyer Center for Molecular medicine,

<sup>2</sup>Department of Pathology, <sup>3</sup>Department of Medicine, <sup>4</sup>Department of Pharmacology, Yale University School of Medicine, 295 Congress Avenue, New Haven, CT 06510.

\* These authors contributed equally to this work.

<sup>5</sup>Corresponding author: Dr. Wang Min, Interdepartmental Program in Vascular Biology and Transplantation, Department of Pathology, Yale University School of Medicine, BCMM 454, 295 Congress Avenue, New Haven, CT 06510.

Tel: 203-785-6047; Fax: 203-737-2293; Email: [wang.min@yale.edu](mailto:wang.min@yale.edu)

**Fig.S1. Characterization of Trx2 TG expression in heart and lung.** The Trx2 transgene in WT and Trx2 TG (line #3) heart and lung sections were detected by indirect immunofluorescence microscopy with anti-HA antibody followed by Alexa Fluor 488 (green)-conjugated anti-mouse secondary antibody. Trx2 transgene was detected in vascular endothelium of heart (**a**) and lung tissues (**b**).

**Fig.S2. Localization of the Trx2 transgene in mitochondria.** Mouse aortic EC (MEC) were isolated from WT and Trx2 TG mice. The localization of Trx2 transgene was determined by indirect immunofluorescence staining with anti-HA antibody followed by Alexa Fluor 594 (red)-conjugated anti-mouse secondary antibody. Cytochrome c (a mitochondrial protein) or Trx1 (a non-mitochondrial protein) was detected with a respective antibody followed by Alexa Fluor 488 (green)-conjugated anti-rabbit secondary antibody. The merged images are shown on the right.

**Fig.S3. Characterization of Trx2 expression and activity in ApoE-deficiency mice.** WT and ApoE-deficiency (ApoE) (n=5 for each group) were fed with Western-type diet for 4 and 8 wks. **a.** Aortas were harvested and paraffin sections were stained with Oil-red. High power images are shown at the bottom. **b-c.** Trx2 expression is reduced in endothelium of ApoE-deficiency mice. Trx2 expression in aortas of WT and ApoE-deficiency mice (8 wks post-diet) was determined by immunohistochemistry (**b**) or Western blot with anti-Trx2 antibody (**c**). The ratio of Trx2/ $\beta$ -tubulin is shown at the bottom of **c**. **d.** Nitrotyrosine and ASK1 activities were dramatically increased in ApoE-deficiency aortas. Trx1, nitrotyrosine (NTY) and ASK1 phosphorylation (pThr845) in aortas of WT and ApoE-deficiency mice (8 wks post-diet) were determined by immunohistochemistry with respective antibodies.

**Fig.S4. ApoE-KO mice show reduction of basal NO release in aortic endothelium.** WT, Trx2-TG, ApoE-deficiency (ApoE) and ApoE/TG (n=5 for each group) were fed with Western-type diet for 4 wks. **a.** Aortas from ApoE-KO mice show an enhanced response to PE. Aortas were contracted with PE at a full range of doses ( $10^{-9}$ - $10^{-4}$  M). **b.** Basal NO is decreased in ApoE-KO mice. Aortic rings were incubated with a NOS inhibitor L-

NAME to remove basal NO synthesis and then contracted with PE as in **a. c.** Ratio of EC<sub>50</sub> in response to PE in the presence of L-NAME to PE in the absence of L-NAME. **d.** Aortas from ApoE-KO mice show an attenuated response to Ach. Aortic rings were precontracted with PE and then relaxed with Ach at a full range of doses (10<sup>-9</sup>-10<sup>-4</sup> M). % of relaxation is shown. **e.** ApoE-KO had no effects on vessel constriction in response to KCl. Aortic rings were contracted with 50 mM of KCl. Data presented are mean±SEM, with n=4 animals and eight aortic rings per animal, \*, *p*<0.05.

**Fig.S1**

**a. Heart**

WT

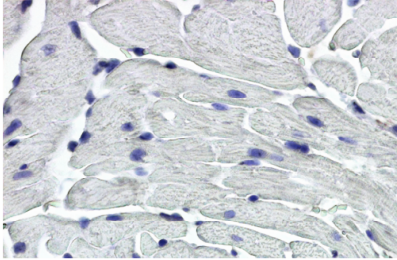

TG

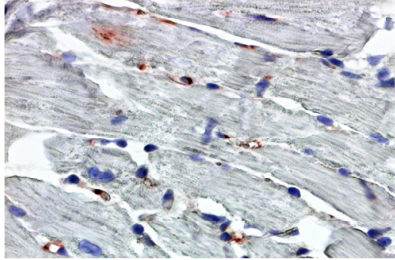

**b. Lung**

WT

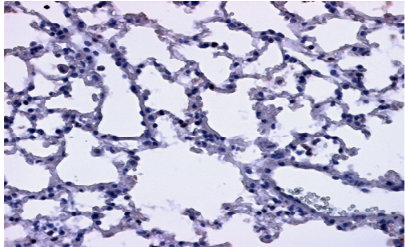

TG

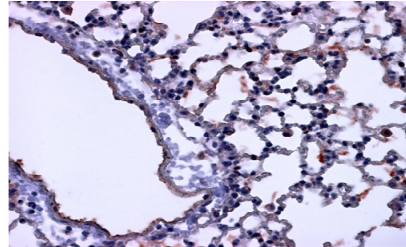

Fig.S2

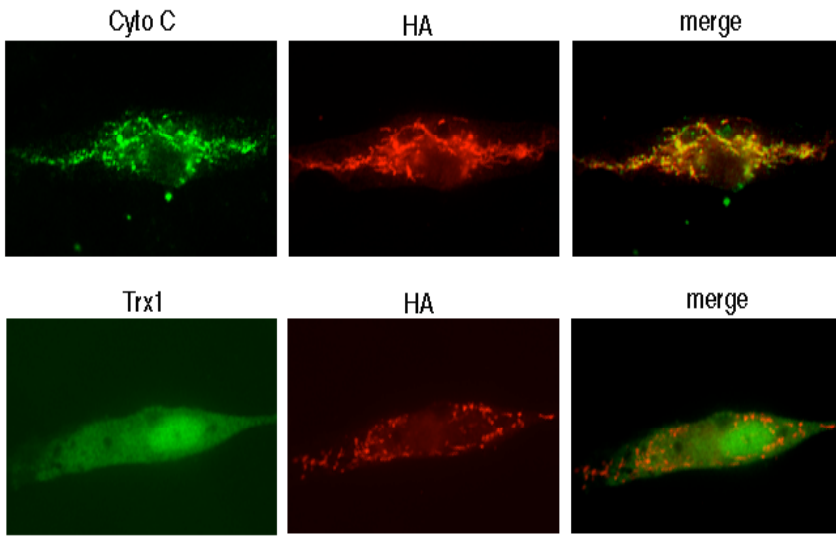

**Fig.S3**

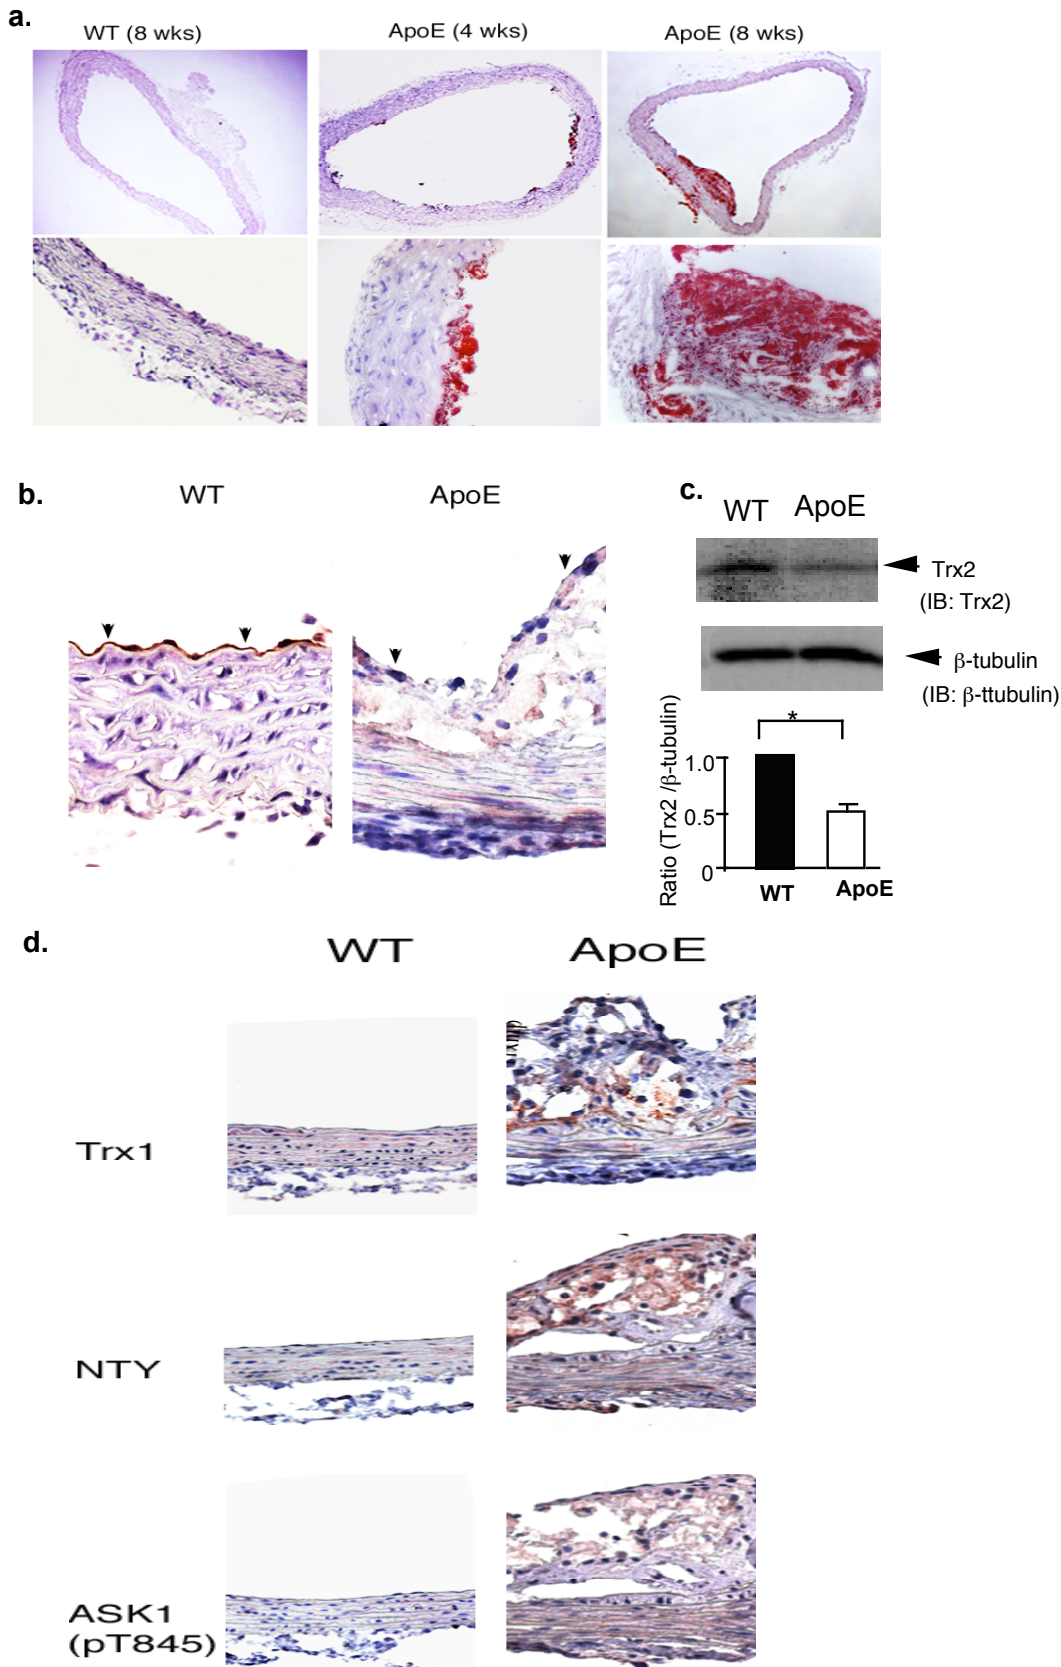

**Fig.S4**

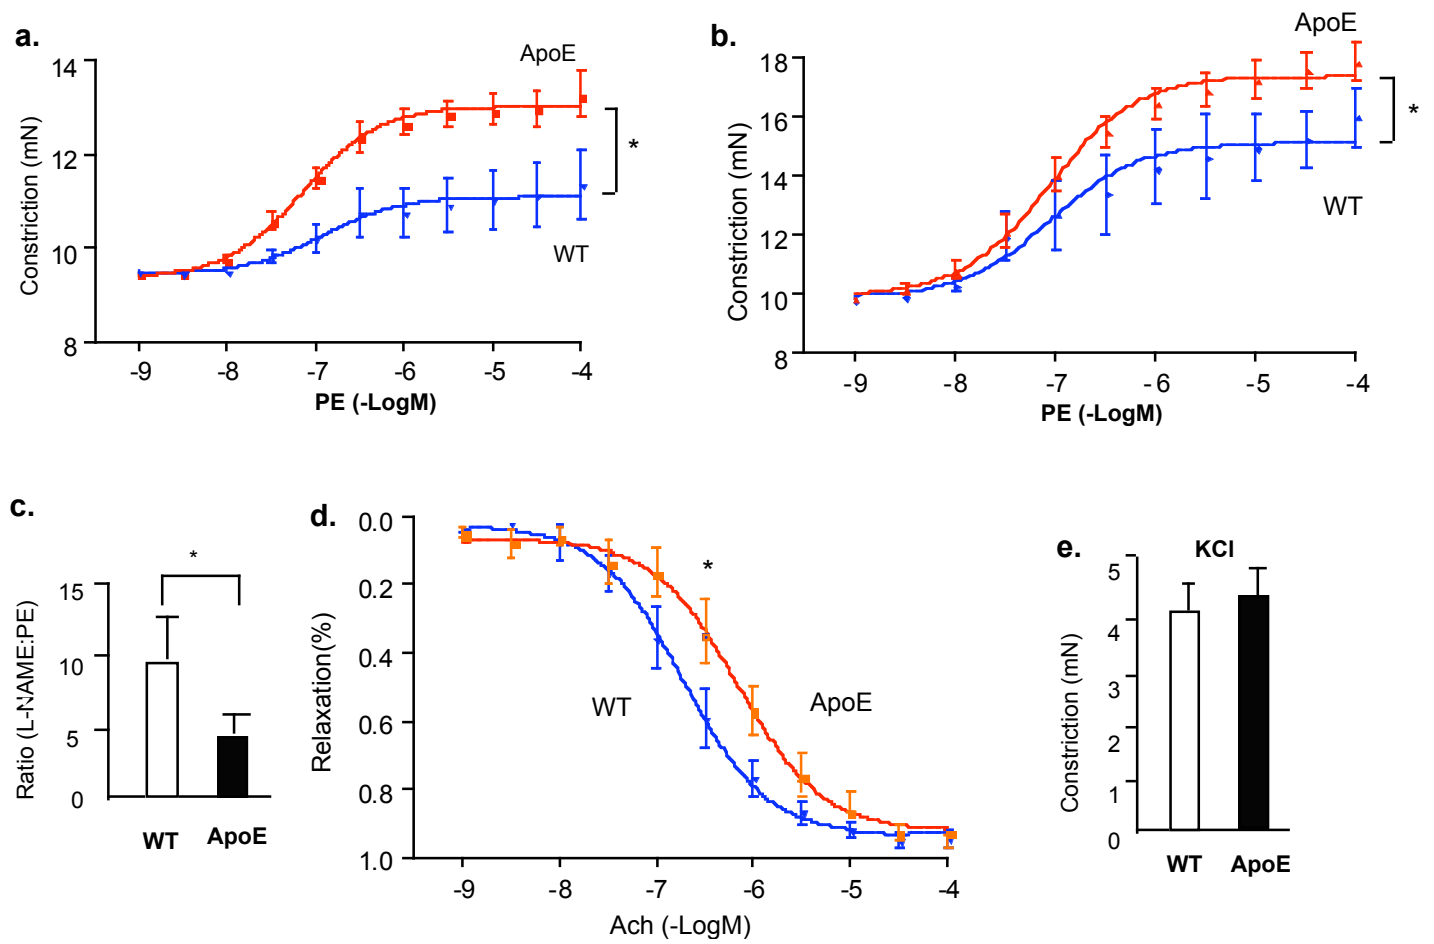

Supplement: amjpathol_170_3_1108__1.pdf [file amjpathol_170_3_1108__1.pdf]
